# Supplementary material for: Nanostructure and Fracture Behavior of Carbon Nanofiber-Reinforced Cement Using Nanoscale Depth-Sensing Methods
Source: MDPI journal article supplement (doi:10.3390/ma13173837), 2020-08-31

# Supplementary Materials: Nanostructure and Fracture Behavior of Carbon NanoFiber-Reinforced Cement Using Nanoscale Depth-Sensing Methods

Ange-Therese Akono <sup>1,2</sup>

<sup>1</sup> Department of Civil and Environmental Engineering, Northwestern University, Evanston, 60208 IL, USA; ange-therese.akono@northwestern.edu

<sup>2</sup> Department of Mechanical Engineering, Northwestern University, Evanston, 60208 IL, USA

## 1. Scanning Electron Microscopy Images

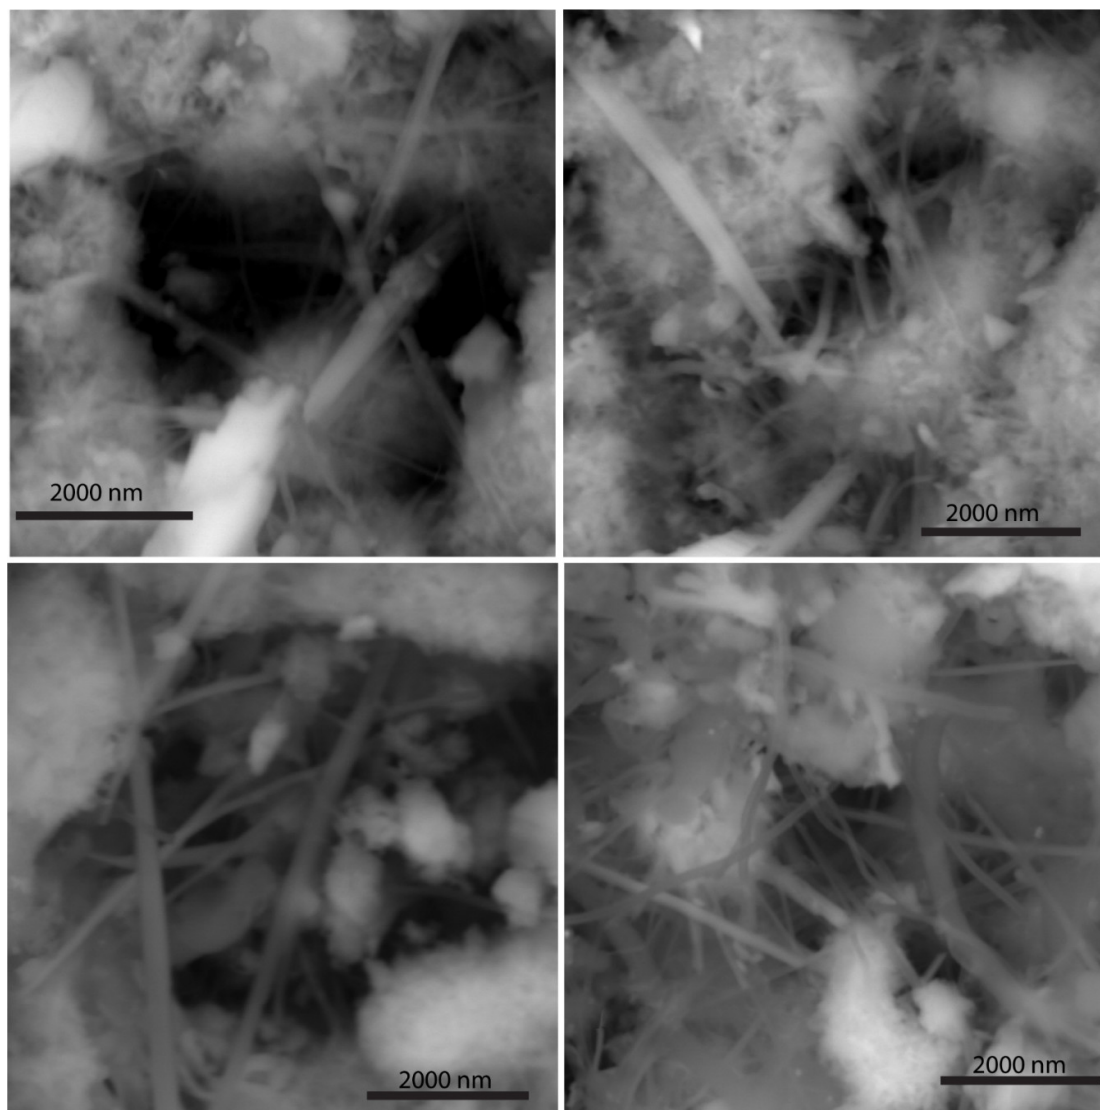

**Figure S1.** Environmental scanning electron images of cement reinforced with 0.5% wt Carbon NanoFibers.

## 2. Fractography Analyses

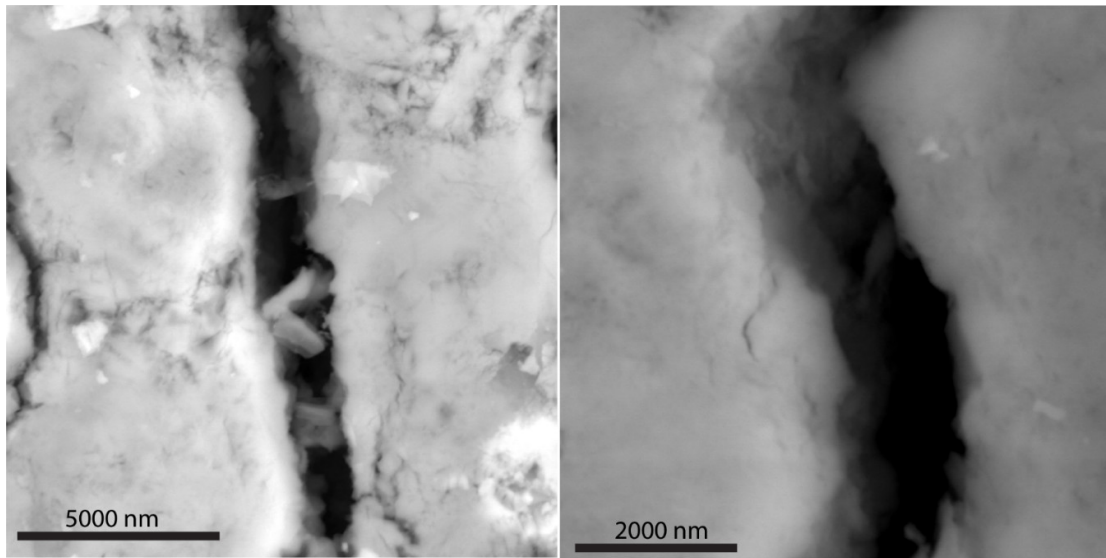

**Figure S2.** Fracture micromechanisms of plain Portland cement.

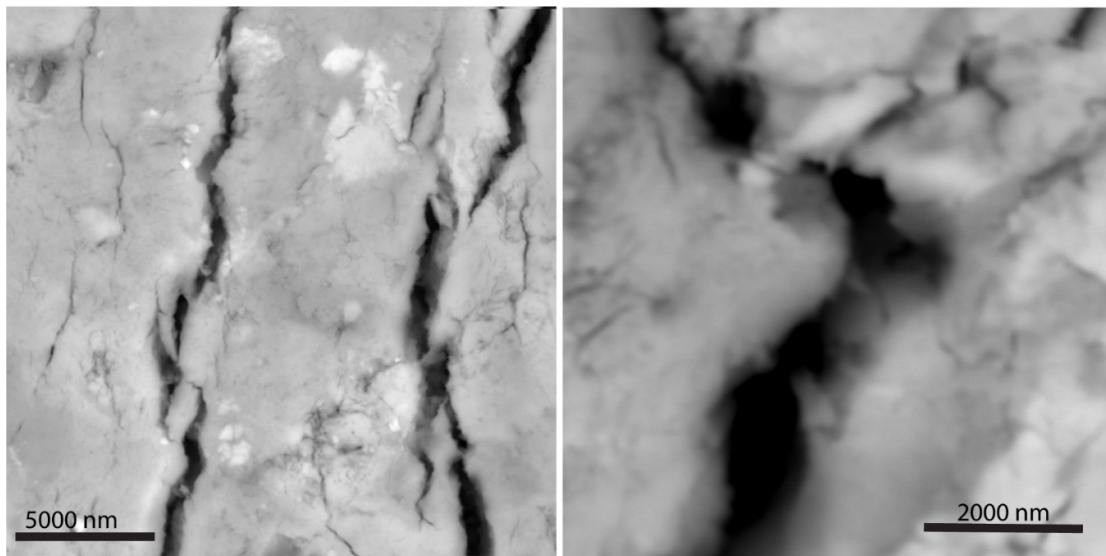

**Figure S3.** Fracture micromechanisms of Portland cement reinforced with 0.5% wt CNF.

### 3. Micromechanics Upscaling Functions

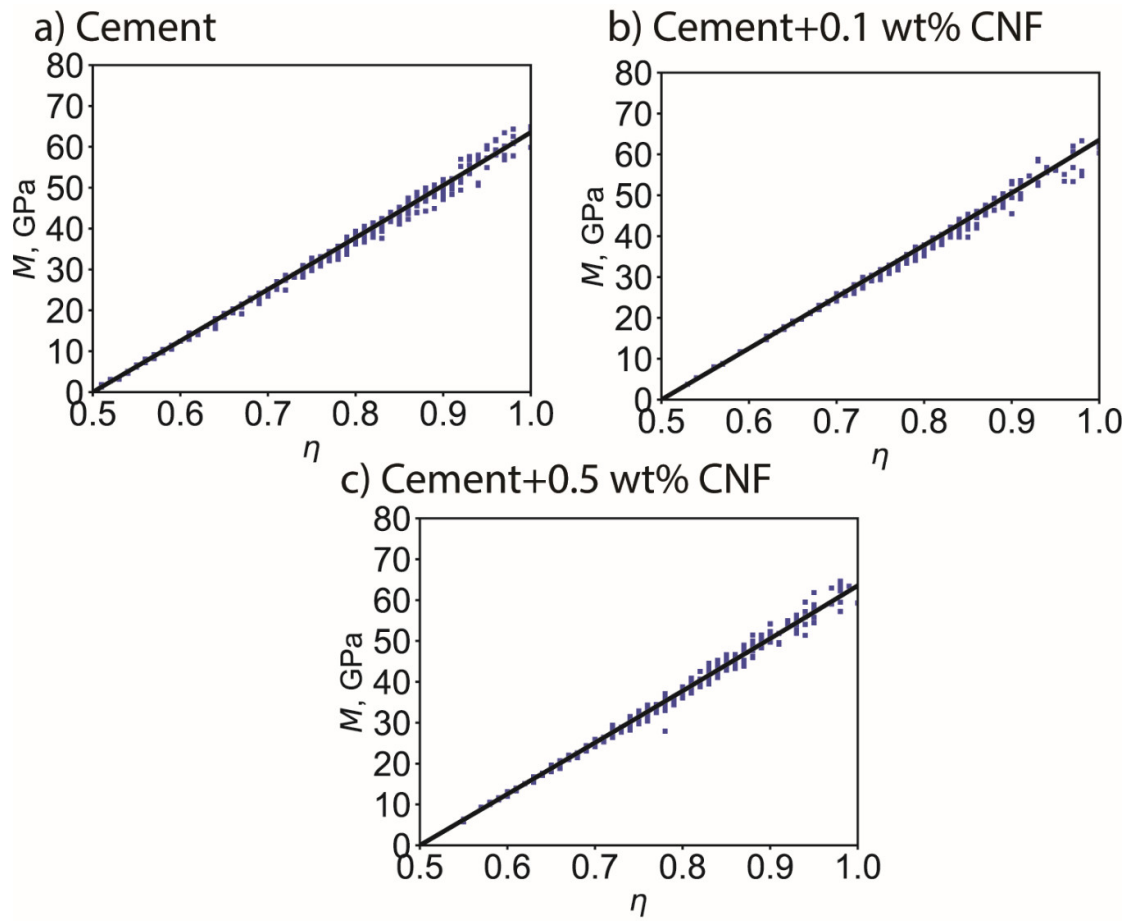

**Figure S4.** Upscaling linear functions for the indentation modulus  $M$ .  $\eta$  is the local packing density. (a) Plain Portland cement. (b) Portland cement + 0.1 wt% CNF. (c) Portland cement + 0.5 wt% CNF.

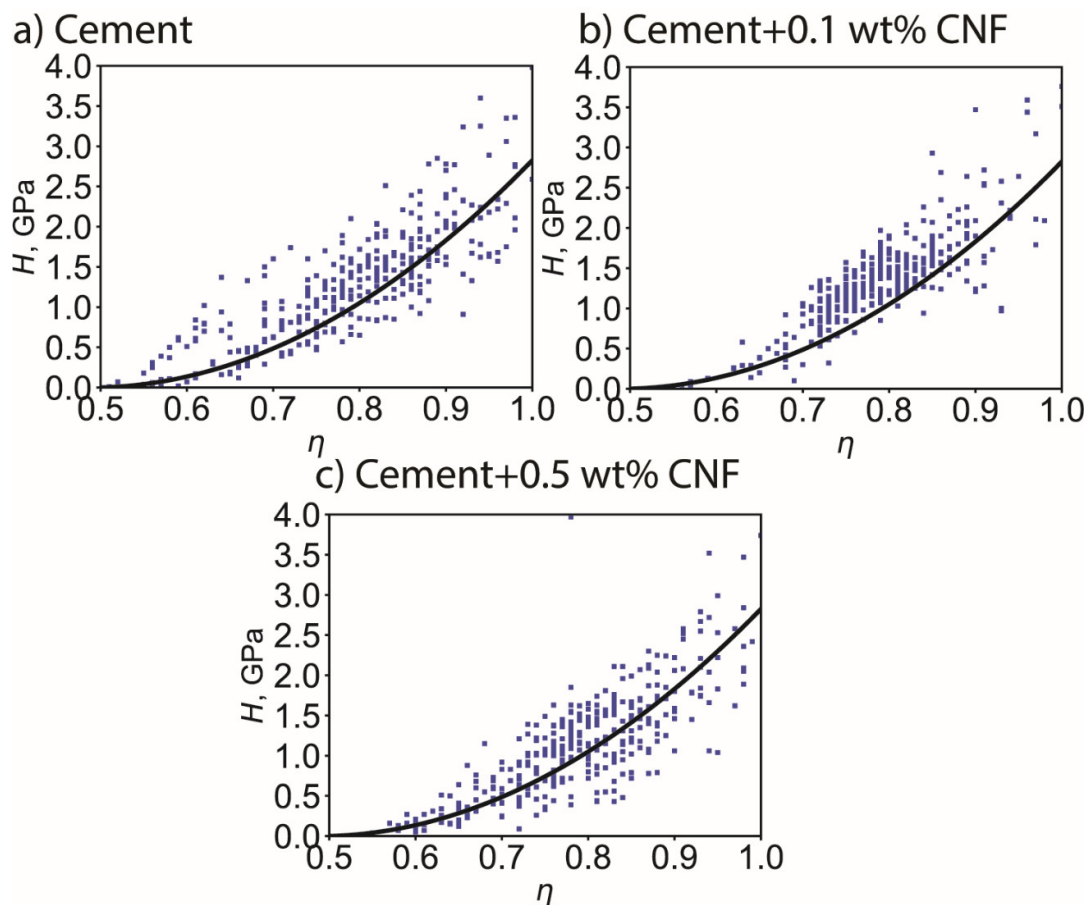

**Figure S5.** Nonlinear upscaling for the indentation hardness  $H$ .  $\eta$  is the local packing density. (a) Plain Portland cement. (b) Portland cement + 0.1 wt% CNF. (c) Portland cement + 0.5 wt% CNF.

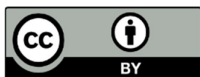

Supplement: s1 [file s1]
